# Supplementary material for: The Effects of Structure and Oxidative Polymerization on Antioxidant Activity of Catechins and Polymers
Source: MDPI journal article supplement (doi:10.3390/foods12234207), 2023-11-22
Supplement: s1 [file s1]

## Supplementary Materials

Table S1. Catechins and TFs used in structure-activity relationship assay

| Compounds |         | Geometrical isomerism | B ring structure | Number of galloyl groups | Position of galloyl groups |
|-----------|---------|-----------------------|------------------|--------------------------|----------------------------|
| Catechins | EGCG    | cis-                  | pyrogallol       | 1                        | -                          |
|           | ECG     | cis-                  | catechol         | 1                        | -                          |
|           | EGC     | cis-                  | pyrogallol       | 0                        | -                          |
|           | EC      | cis-                  | catechol         | 0                        | -                          |
|           | GCG     | trans-                | pyrogallol       | 1                        | -                          |
|           | CG      | trans-                | catechol         | 1                        | -                          |
|           | GC      | trans-                | pyrogallol       | 0                        | -                          |
|           | C       | trans-                | catechol         | 0                        | -                          |
| TFs       | TF      | -                     | -                | 0                        | -                          |
|           | TF-3-G  | -                     | -                | 1                        | 3                          |
|           | TF-3'-G | -                     | -                | 1                        | 3'                         |
|           | TFDG    | -                     | -                | 2                        | 3 + 3'                     |

Note: “-” means this column is not the object of study for this compound. EC, (-)-epicatechin; ECG, (-)-epicatechin gallate; EGC, (-)-epigallocatechin; EGCG, (-)-epigallocatechin gallate; C, (±)-catechin; CG, (-)-catechin gallate; GC, (-)-gallocatechin; GCG, (-)-gallocatechin gallate; TFs, theaflavins; TF, theaflavin; TF3G, theaflavin-3-gallate; TF3'G, theaflavin-3'-gallate; TFDG, Theaflavin-3,3'-digallate.

A

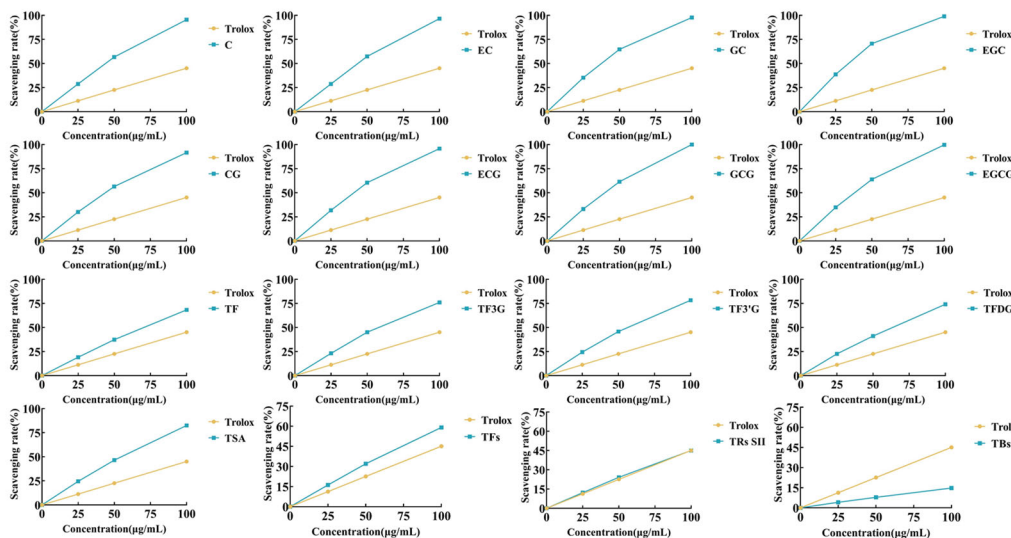

B

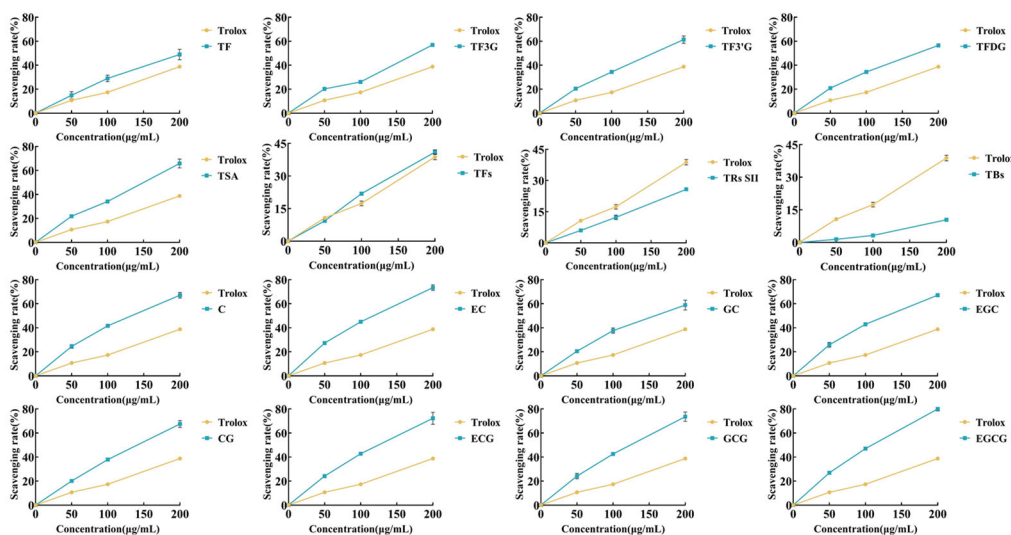

C

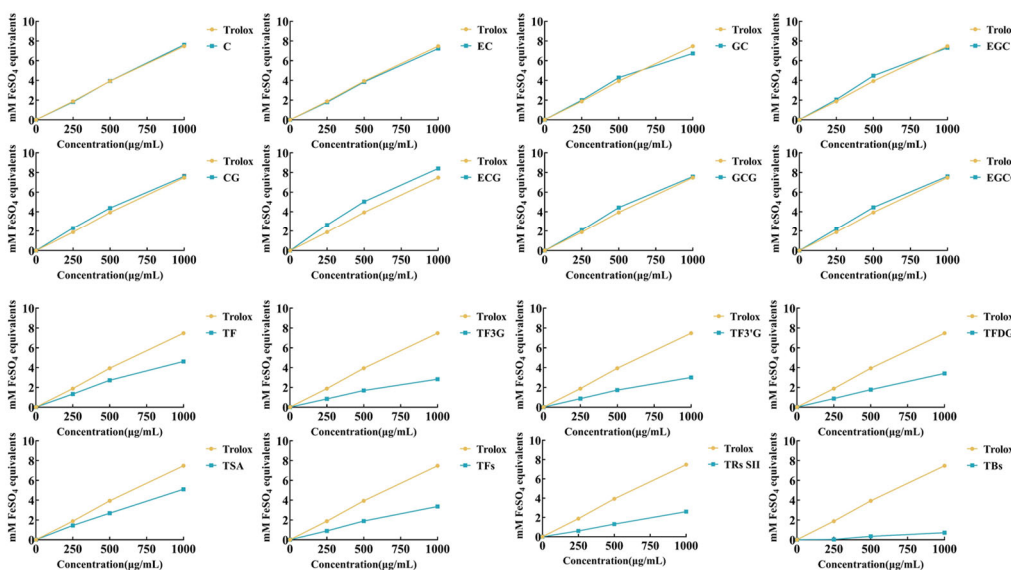

**Figure S1.** Dose-effect relationship of antioxidant activity of catechins and their oxidized polymers (CTOPs). (A) Dose-effect relationship of ABTS<sup>+</sup> free radical scavenging activity; (B) Dose-effect relationship of DPPH free radical scavenging activity; (C) Dose-effect relationship of total antioxidant capacity. Trolox was used as positive control. Theaflavins (TFs), thearubigins S II (TRs S II), and theabrownins (TBs) were components isolated from a tea sample by solvent extraction. TSA, theasinensin A.

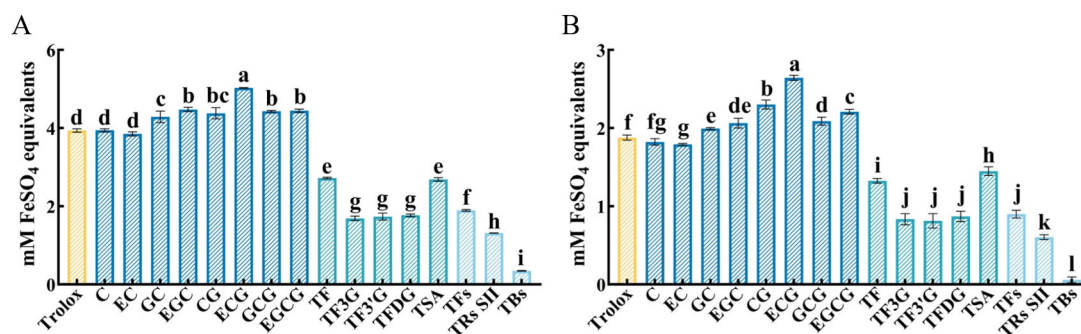

**Figure S2.** Total antioxidant capacity assay with FRAP method at 0.5 mg/mL (A) and 0.25 mg/mL (B).

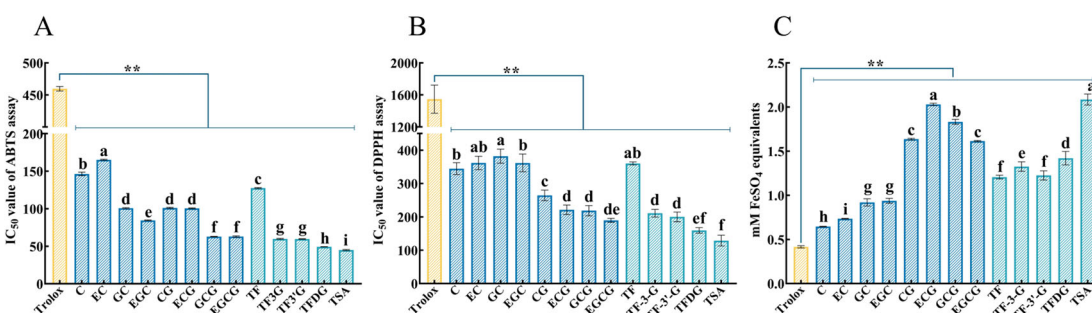

**Figure S3.** Comparison of antioxidant activities of catechins and their dimers at molarity. (A) ABTS<sup>+</sup> free radical scavenging activity of catechins and their dimers; (B) DPPH free radical scavenging activity of catechins and their dimers; (C) Total antioxidant capacity of catechins and their dimers. The molarity used in total antioxidant capacity assay was 250 μM. a,b,c,d Different letters above the column indicate significant differences (p < 0.05).

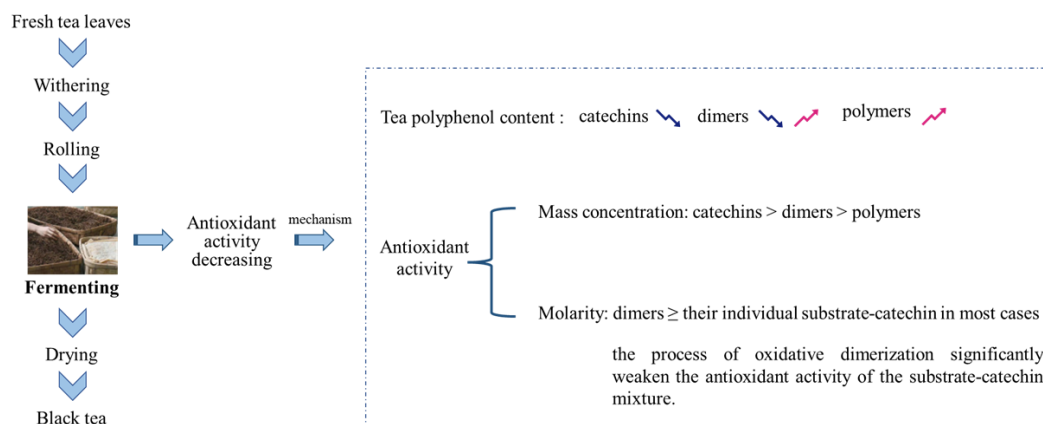

**Figure S4.** Declining mechanism of antioxidant activity during black tea fermentation.
